# Supplementary material for: Global biogenic isoprene emissions 2013–2020 inferred from satellite isoprene observations
Source: Copernicus journal article supplement (doi:10.5194/essd-2025-424), 2025-08-18
Supplement: Supplementary file 1 [file essd-2025-424-supplement.pdf]

Supplementary information

**Global biogenic isoprene emissions 2013-2020 inferred from satellite isoprene observations**

Hui Li<sup>1,2#</sup>, Philippe Ciais<sup>1</sup>, Pramod Kumar<sup>1</sup>, Didier A. Hauglustaine<sup>1</sup>, Frédéric Chevallier<sup>1</sup>, Grégoire Broquet<sup>1</sup>, Dylan B. Millet<sup>3</sup>, Kelley C. Wells<sup>3</sup>, Jinghui Lian<sup>1,4</sup>, Bo Zheng<sup>2,5</sup>

<sup>1</sup>Laboratoire des Sciences du Climat et de l'Environnement, LSCE/IPSL, CEA-CNRS-UVSQ, Université Paris-Saclay, F-91191 Gif-sur-Yvette, France.

<sup>2</sup>Shenzhen Key Laboratory of Ecological Remediation and Carbon Sequestration, Institute of Environment and Ecology, Tsinghua Shenzhen International Graduate School, Tsinghua University, Shenzhen 518055, China.

<sup>3</sup>University of Minnesota, St. Paul, MN 55108, USA.

<sup>4</sup>Origins.earth, SUEZ Group, Immeuble Altiplano, 4 Place de la Pyramide, 92800 Puteaux, France

<sup>5</sup>State Environmental Protection Key Laboratory of Sources and Control of Air Pollution Complex, Beijing 100084, China.

*Correspondence to:* Hui Li ([hui.li@lsce.ipsl.fr](mailto:hui.li@lsce.ipsl.fr))

This file includes:

- Figures S1 to S25
- Tables S1-S3

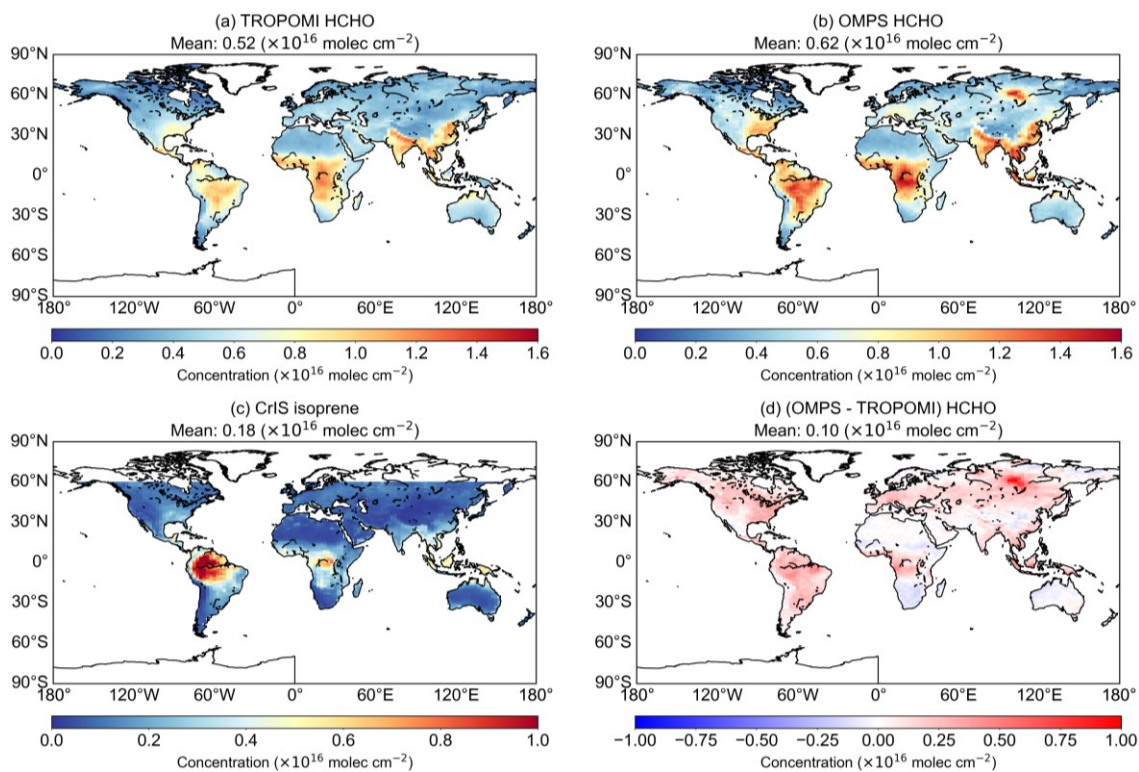

**Figure S1.** The global distribution of annual average HCHO and isoprene concentration in 2019. (a) and (b) present the HCHO concentration from TROPOMI and OMPS. (c) shows the isoprene concentration from CrIS. (d) shows the difference between OMPS and TROPOMI HCHO concentration.

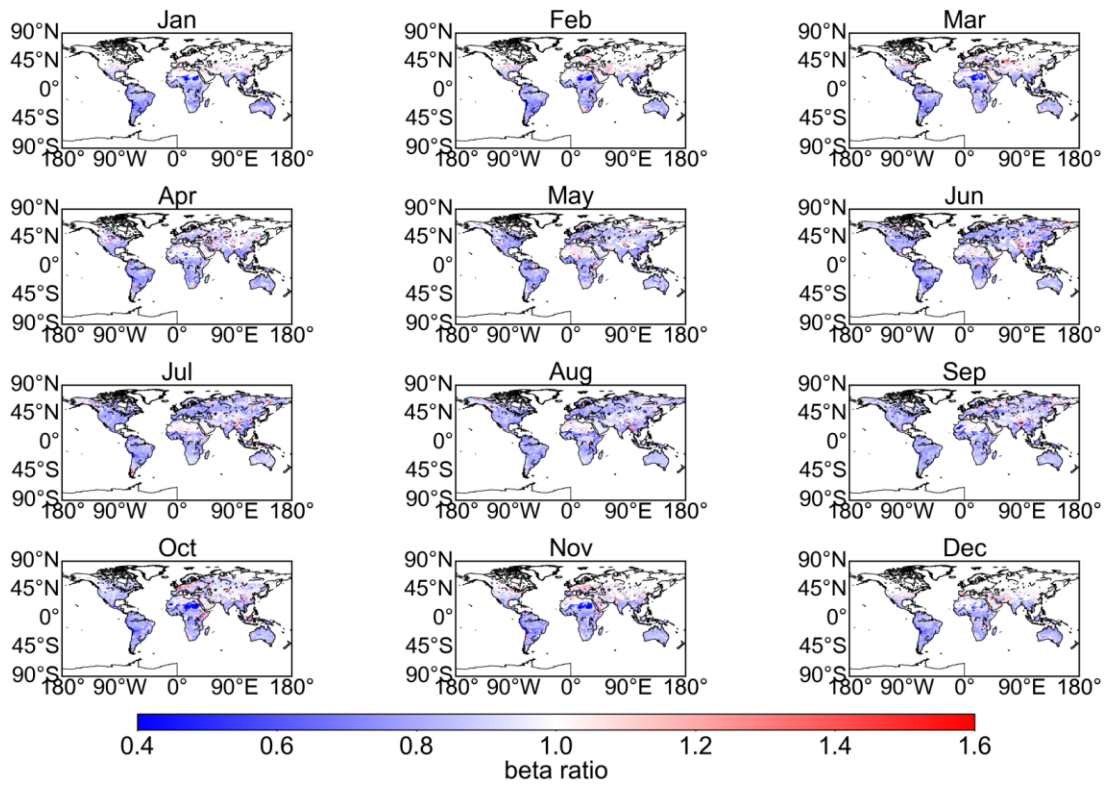

**Figure S2.** The distribution of  $(\beta_{+25\%}/\beta_{-40\%})$  ratio in 2019.

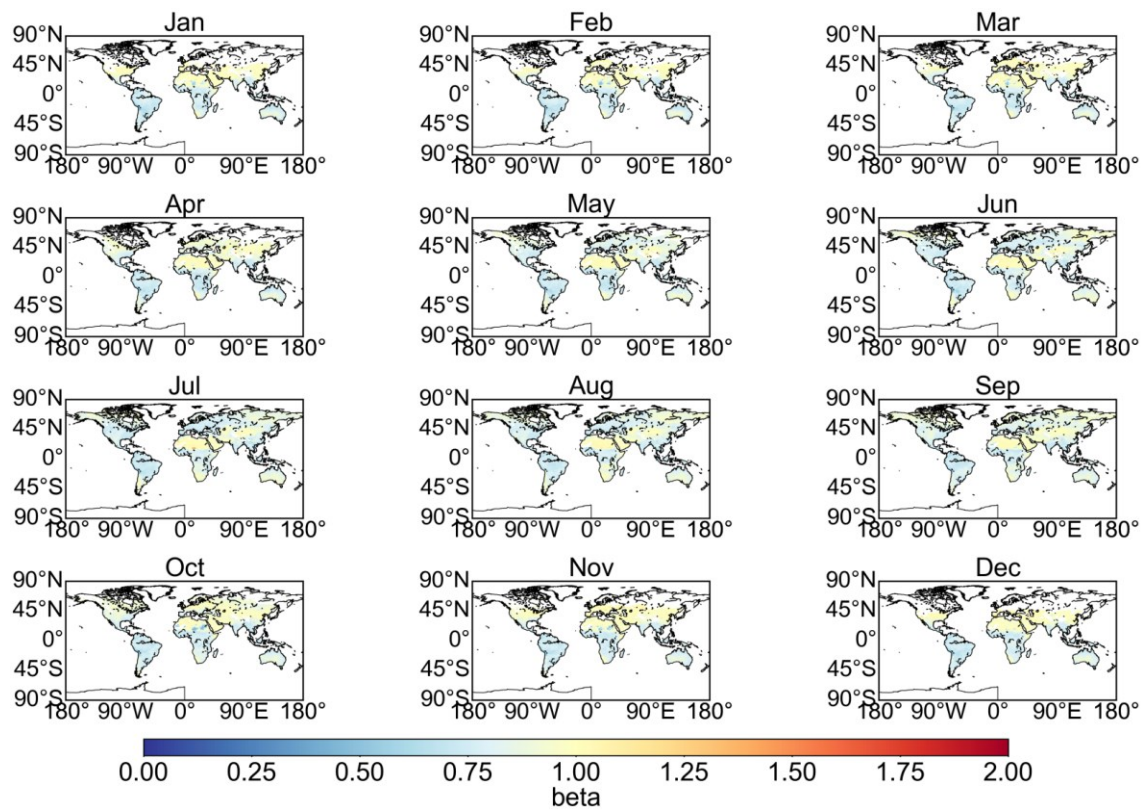

**Figure S3.** An example of monthly  $\beta$  distribution in 2019.

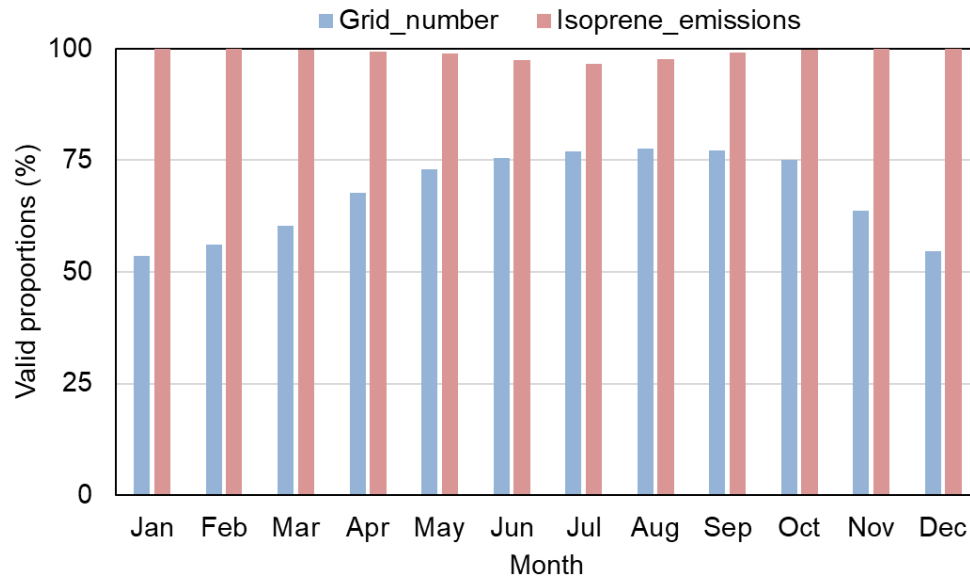

**Figure S4.** Proportions of grids with updated emissions, including the grid number proportions and emission proportions. We here use prior maps to calculate the proportions.

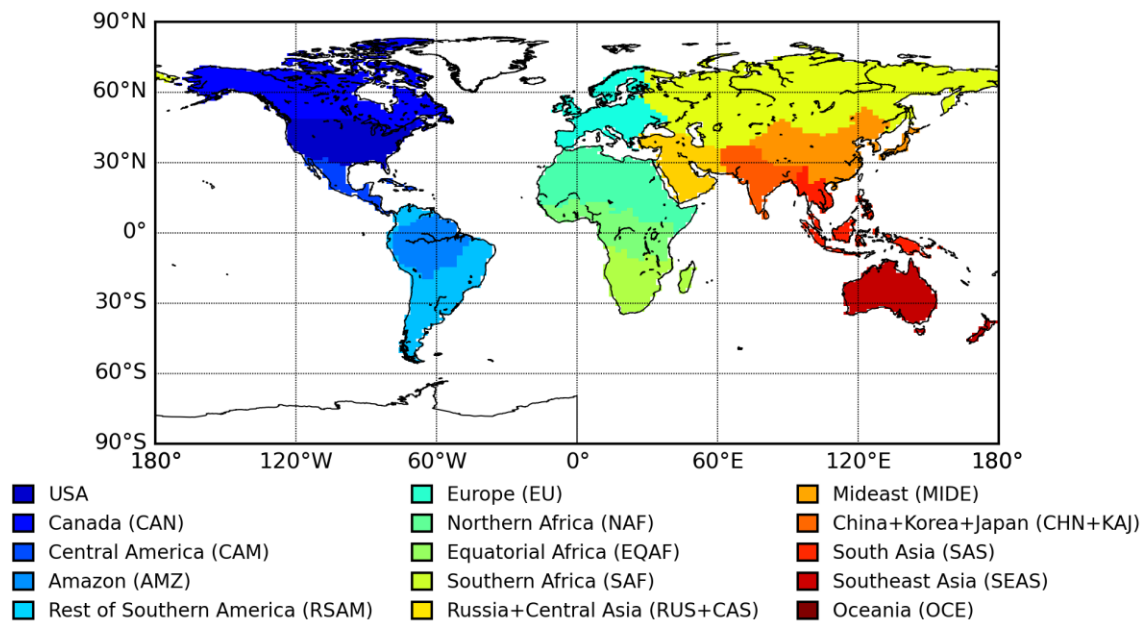

**Figure S5.** The 15-region classification in this study.

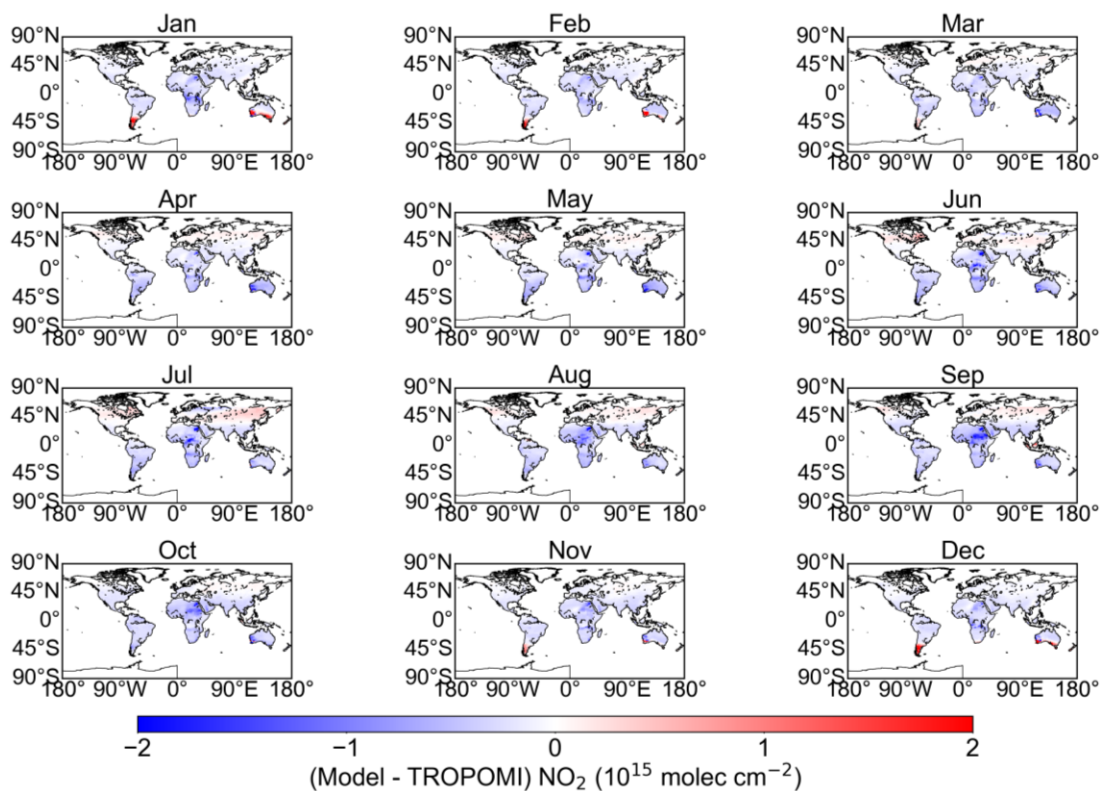

**Figure S6.** Comparison of LMDZ-INCA simulated NO<sub>2</sub> with TROPOMI observed NO<sub>2</sub> column concentration in 2019. Here the modeled NO<sub>2</sub> concentration has been resampled at TROPOMI overpass time and recalculated as model equivalence, the same as HCHO process.

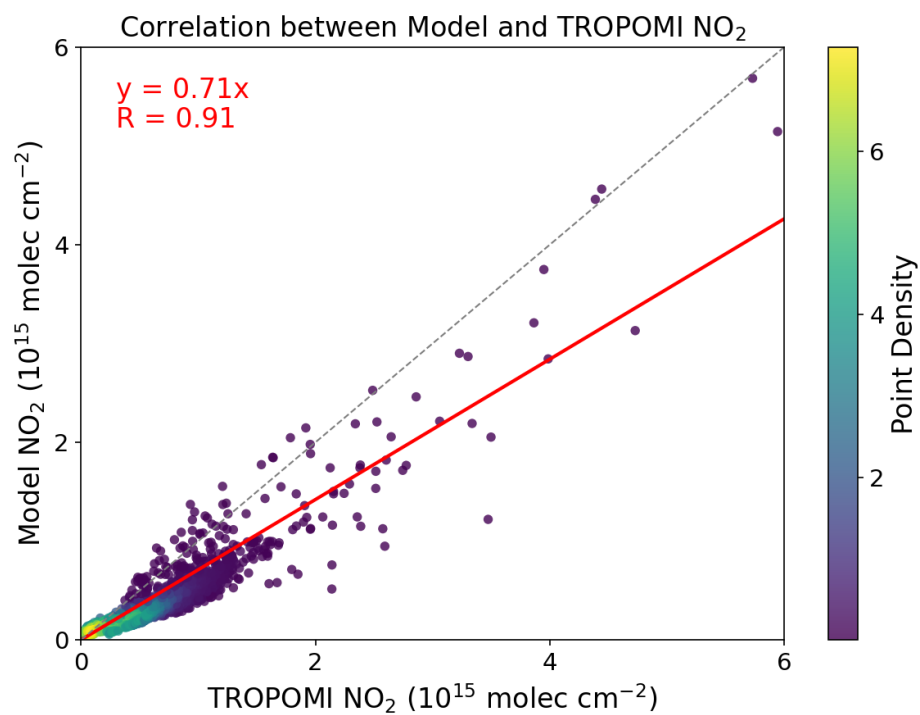

**Figure S7.** Correlation of LMDZ-INCA simulated NO<sub>2</sub> with TROPOMI observed NO<sub>2</sub> column concentration, colored by the grid density.

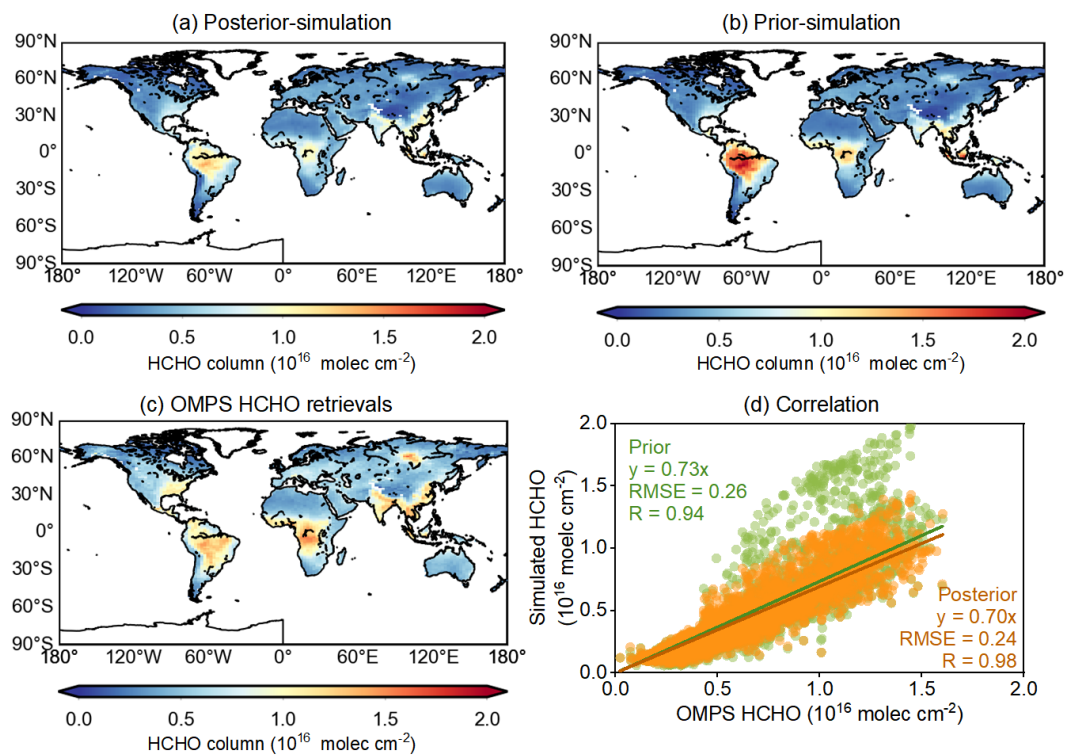

**Figure S8.** Comparison of simulated HCHO with OMPS observed HCHO column concentration.

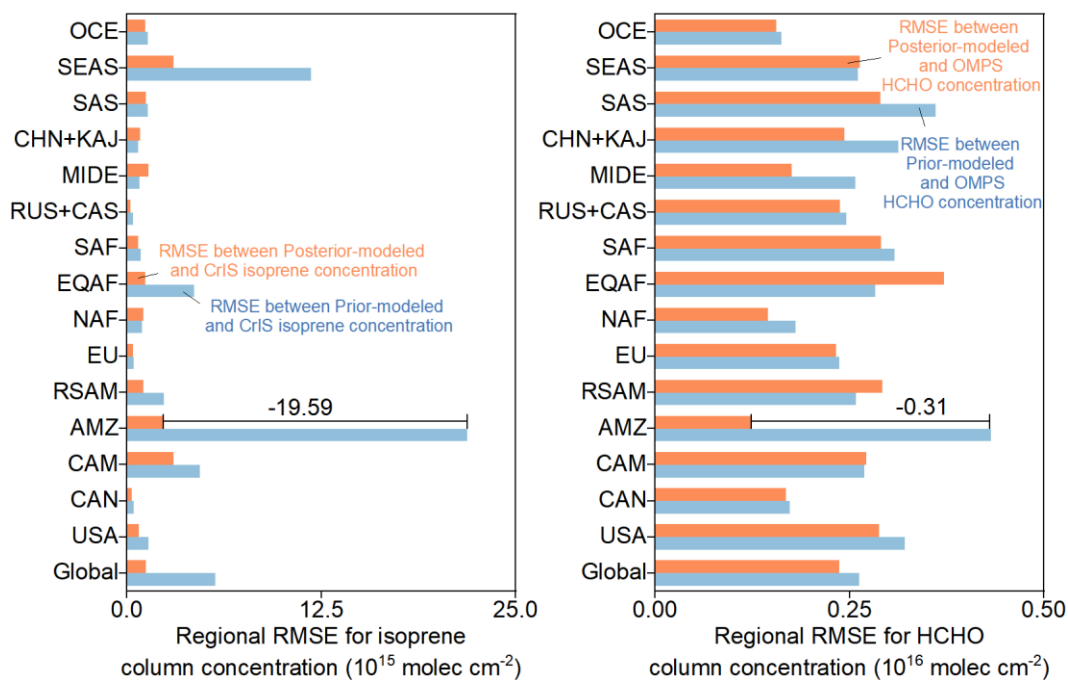

**Figure S9.** Global and regional Root Mean Squared Error (RMSE) for isoprene (left panel) and HCHO (right panel) column concentrations.

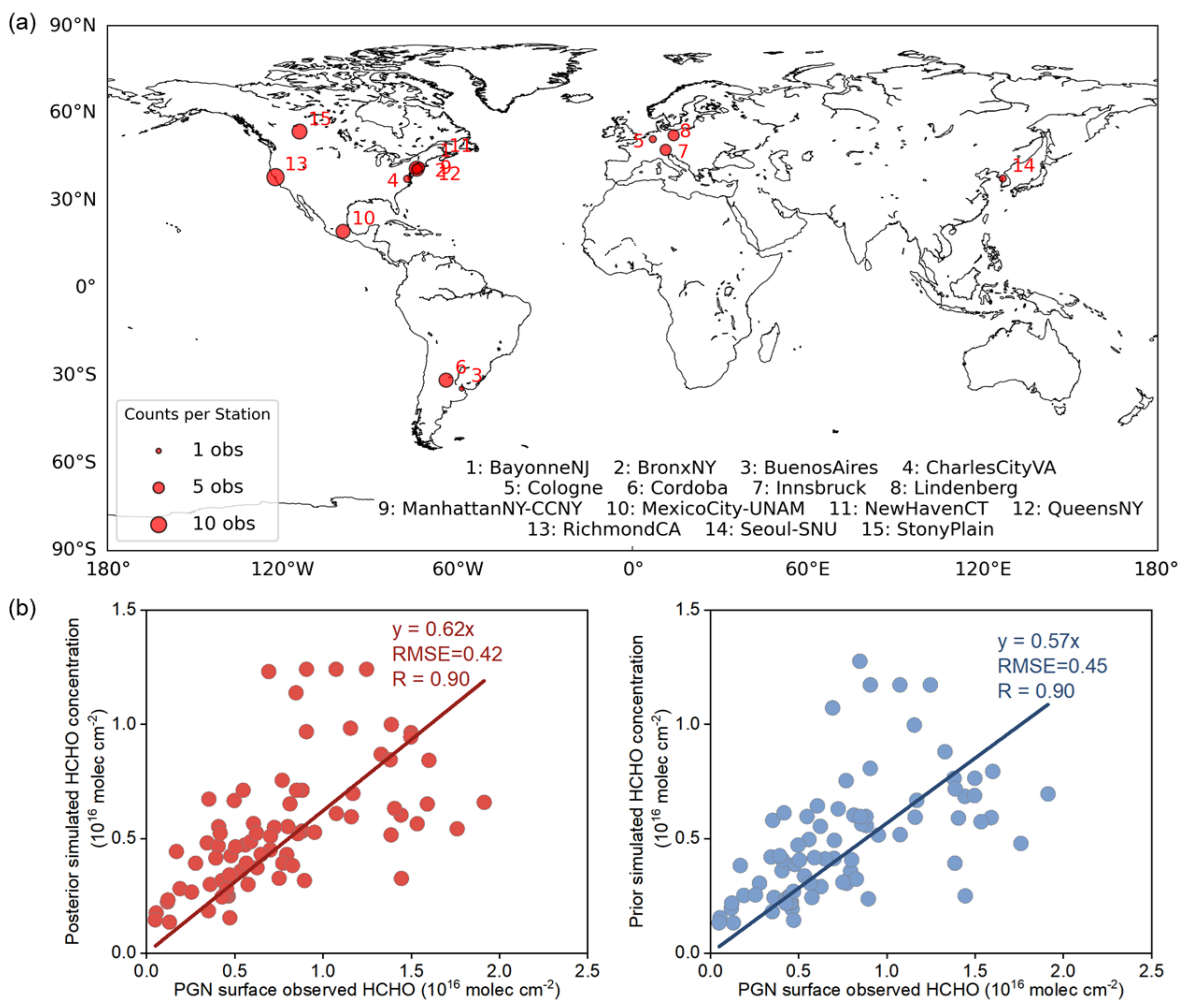

**Figure S10.** The comparison of HCHO column concentration between simulation and PGN surface observation. (a) shows the distribution of PGN stations used in this study, which provided official data for 2019 and are located between 60°S and 60°N. (b) compares the correlation between posterior simulated, prior simulated and PGN observed HCHO column concentrations. PGN data are acquired from <https://www.pandonia-global-network.org/>.

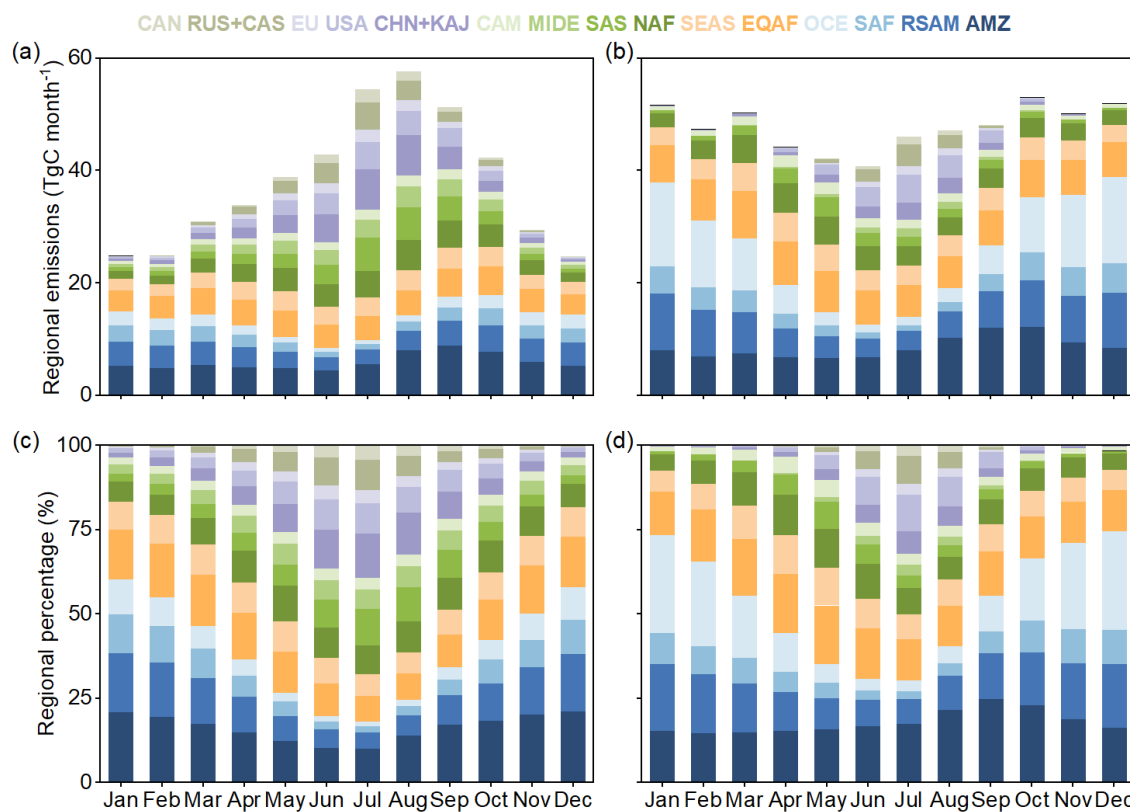

**Figure S11.** The comparison of regional monthly emissions between posteriors and MEGAN-MACC. (a) and (c) are the monthly absolute isoprene emissions and proportions to global totals for posteriors. (b) and (d) are the same for MEGAN-MACC inventory.

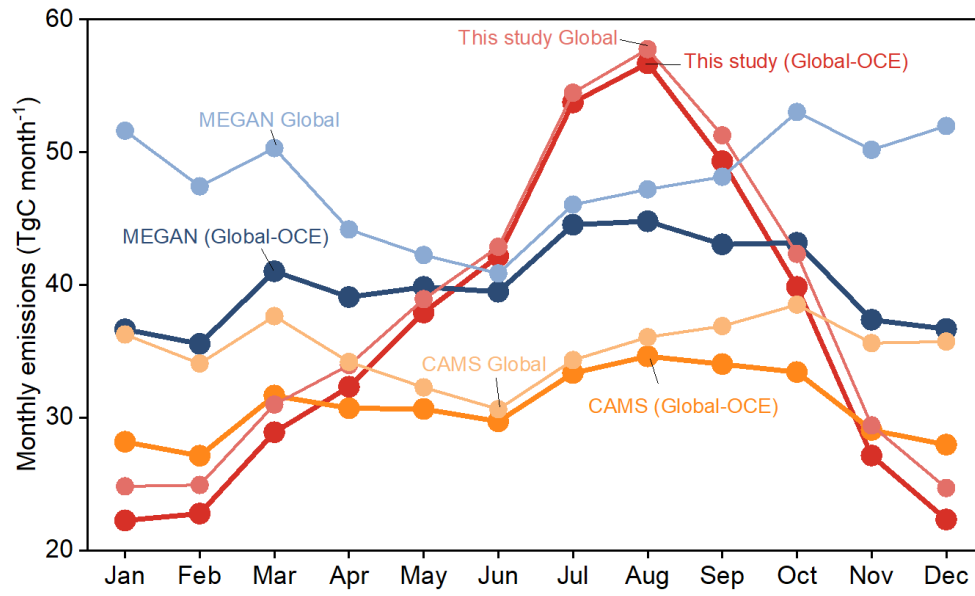

**Figure S12.** The comparison of seasonal patterns between posterior and inventories with and without Oceania (OCE) region.

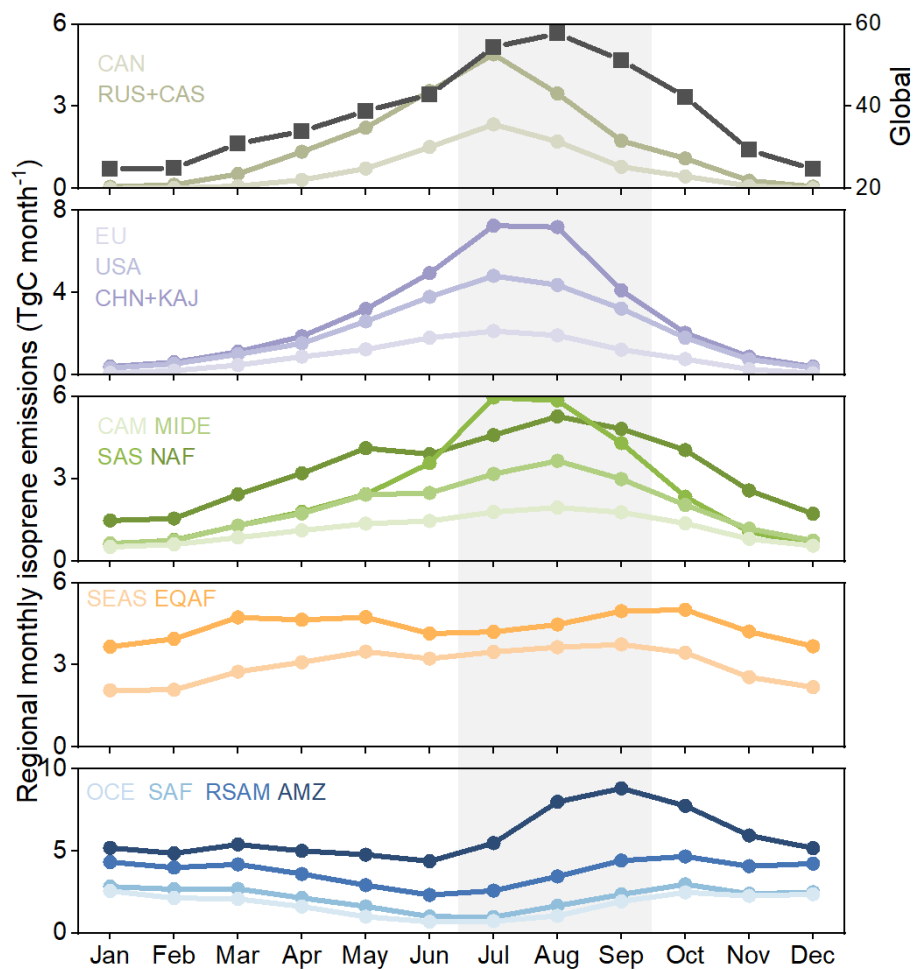

**Figure S13.** Monthly pattern of regional isoprene emissions averaged from 2013 to 2020.

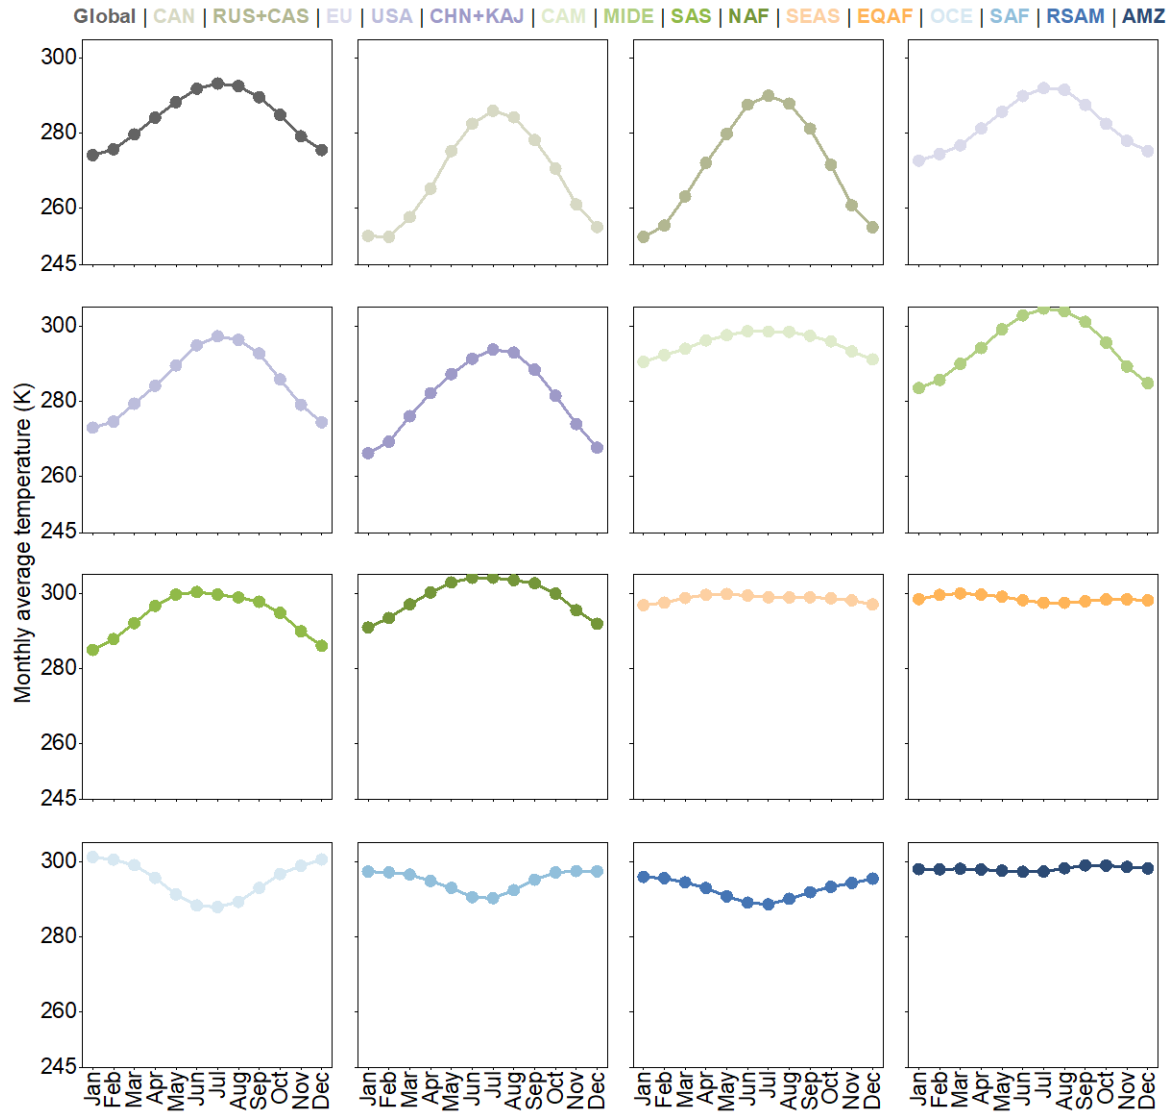

**Figure S14.** Global and regional monthly temperature fluctuation, with color referring regions. To highlight the fluctuation, the y-axis range are set to be the same in all panels. Data are acquired from ERA5 (<https://cds.climate.copernicus.eu/datasets/reanalysis-era5-single-levels?tab=overview>).

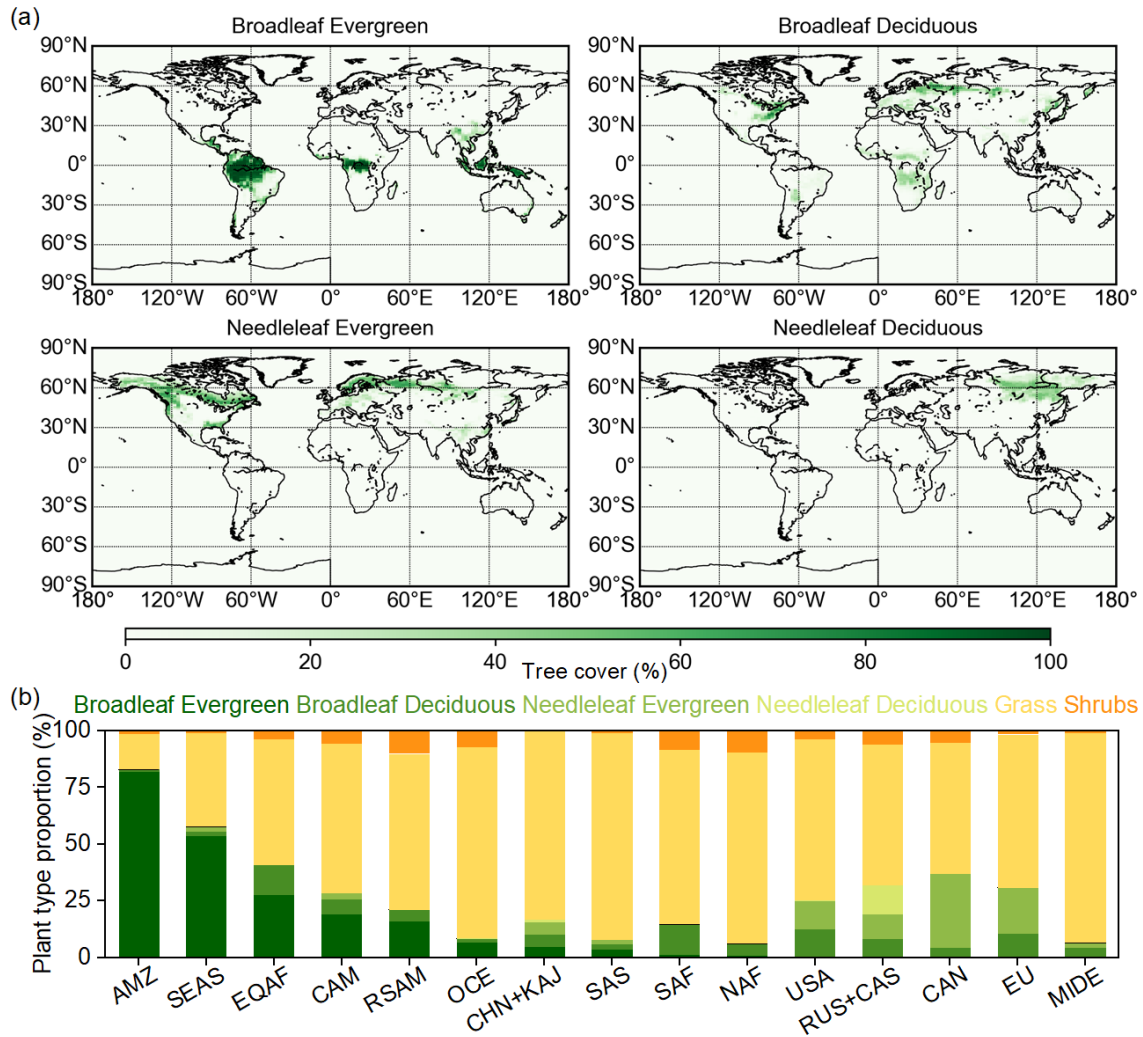

87

88 **Figure S15.** Distribution of plant type averaged from 2013 to 2020. (a) shows the four tree types  
 89 distribution and (b) presents the percentage of all plant type in each region. Data are acquired from ESA  
 90 Land Cover Climate Change Initiative (Land\_Cover\_cci): Global Plant Functional Types (PFT) Dataset,  
 91 v2.0.8 (Li et al., 2018).

92

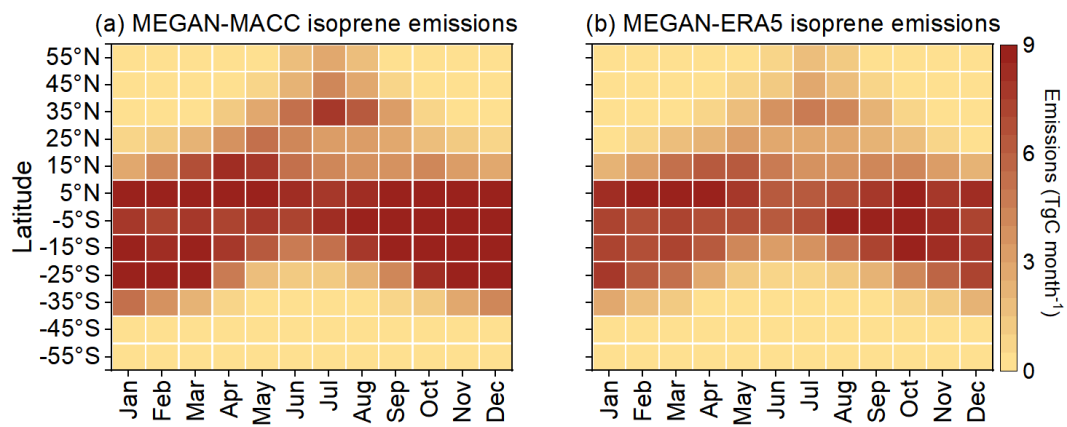

**Figure S16.** Monthly distributions of MEGAN-MACC and MEGAN-ERA5 by every 10° latitude band, respectively.

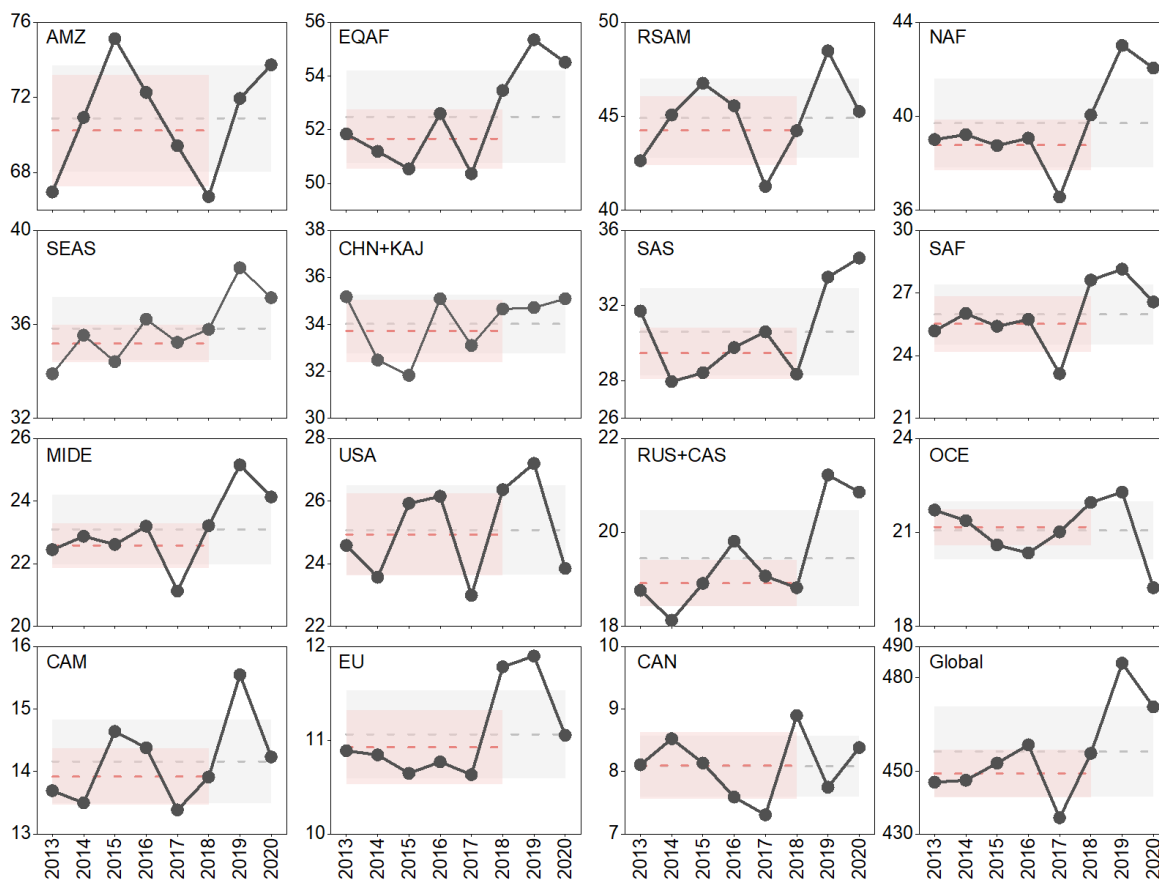

**Figure S17.** Annual global and regional isoprene emissions ( $\text{TgC yr}^{-1}$ ) from 2013 to 2020. The gray dashed line is the annual average isoprene emissions from 2013 to 2020, and the gray shadow indicate corresponding one standard deviation ( $1\sigma$ ). The red dashed line is the annual average isoprene emissions from 2013 to 2018, and the red shadow indicate corresponding one standard deviation ( $1\sigma$ ).

103

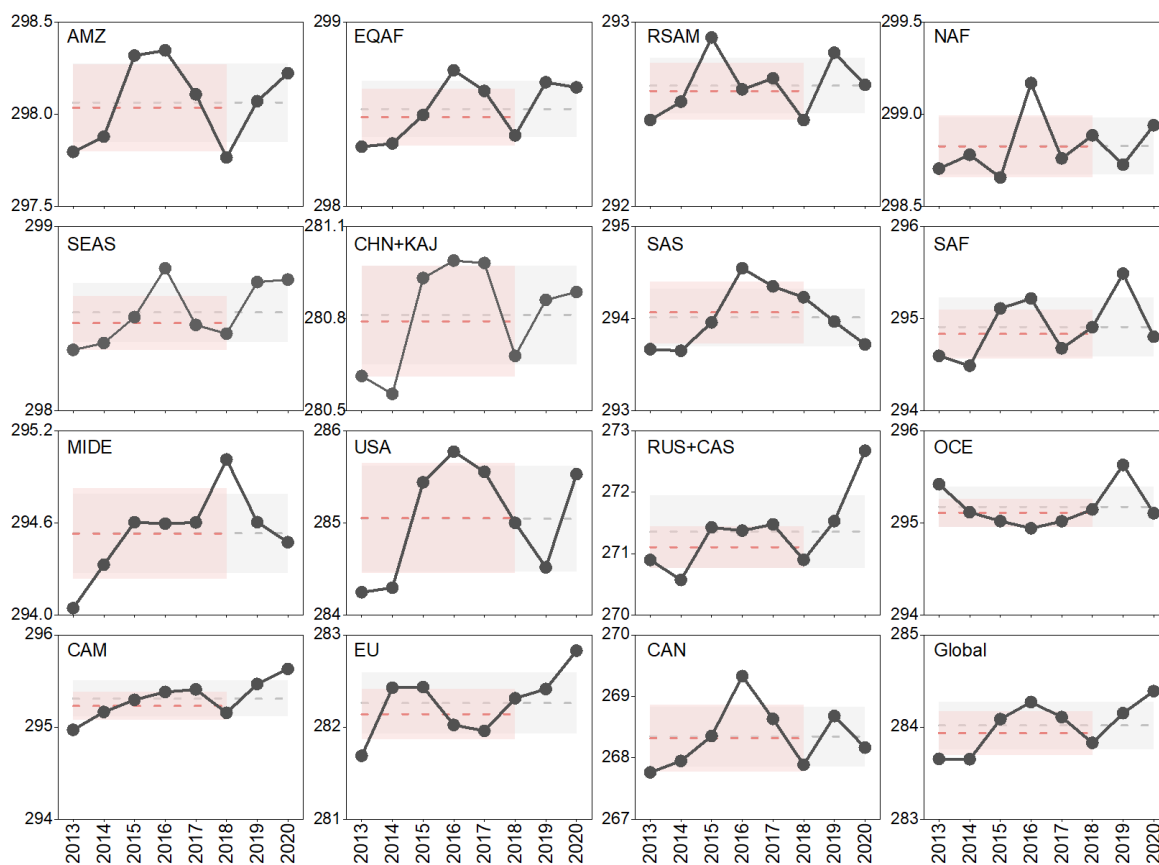

104

105 **Figure S18.** Regional and global annual average temperature (K) over land area from 2013 to 2020.  
 106 The gray dashed line is the annual average temperature from 2013 to 2020, and the gray shadow indicate  
 107 corresponding one standard deviation ( $1\sigma$ ). The red dashed line is the annual average temperature from  
 108 2013 to 2018, and the red shadow indicate corresponding one standard deviation ( $1\sigma$ ).  
 109

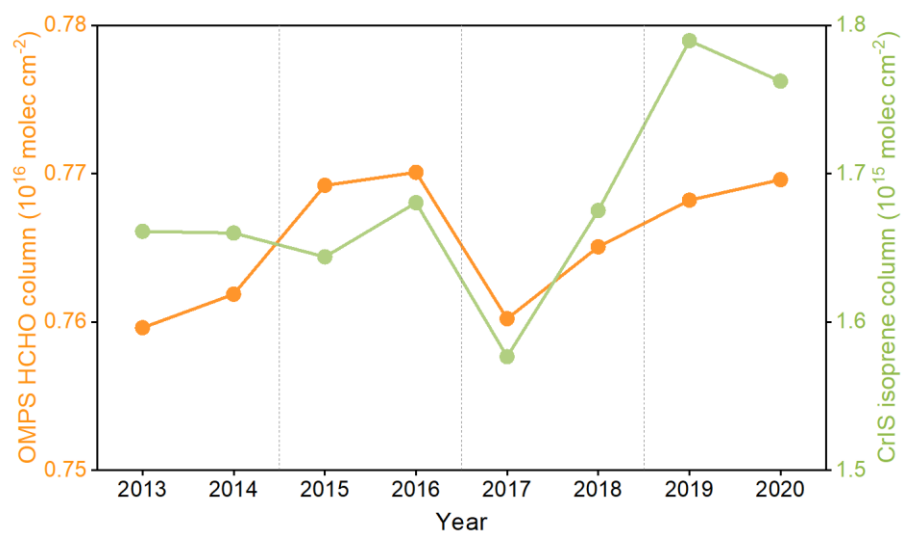

**Figure S19.** Annual average OMPS HCHO concentration and CrIS isoprene concentration from 2013 to 2020.

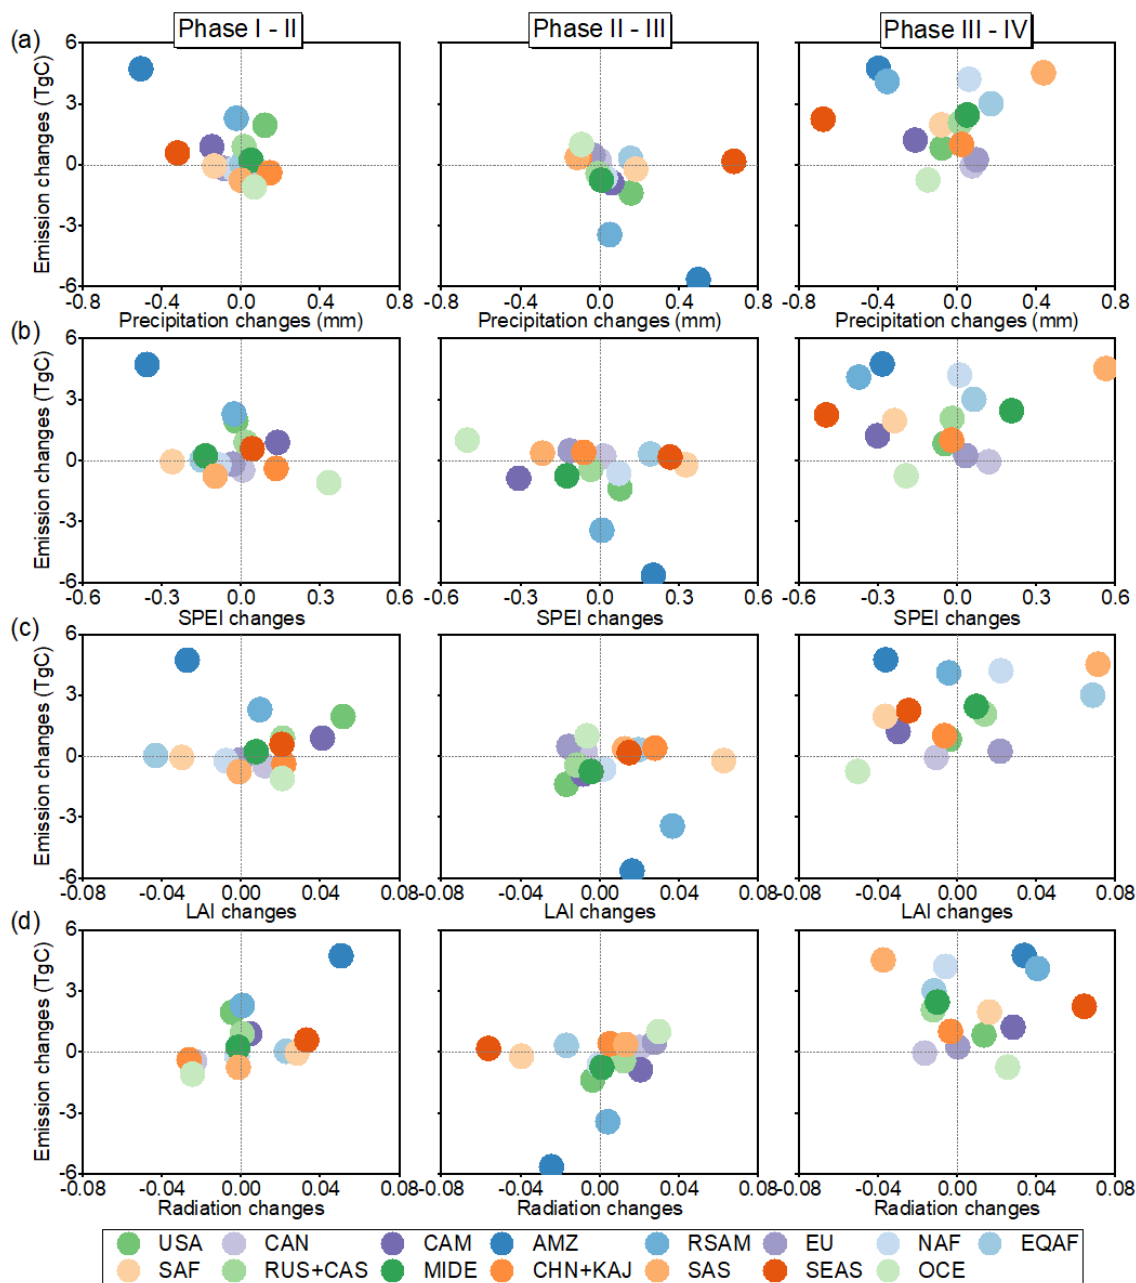

**Figure S20.** Correlation between the regional isoprene emission changes and (a) precipitation changes (mm), (b) SPEI changes, (c) Leaf area index (LAI) changes, and (d) radiation ( $\text{MJ m}^{-2}$ ) across four phases. SPEI data is from ECMWF (<https://xds-preprod.ecmwf.int/datasets/derived-drought-historical-monthly?tab=overview>). LAI is acquired from Pu et al. (2024).

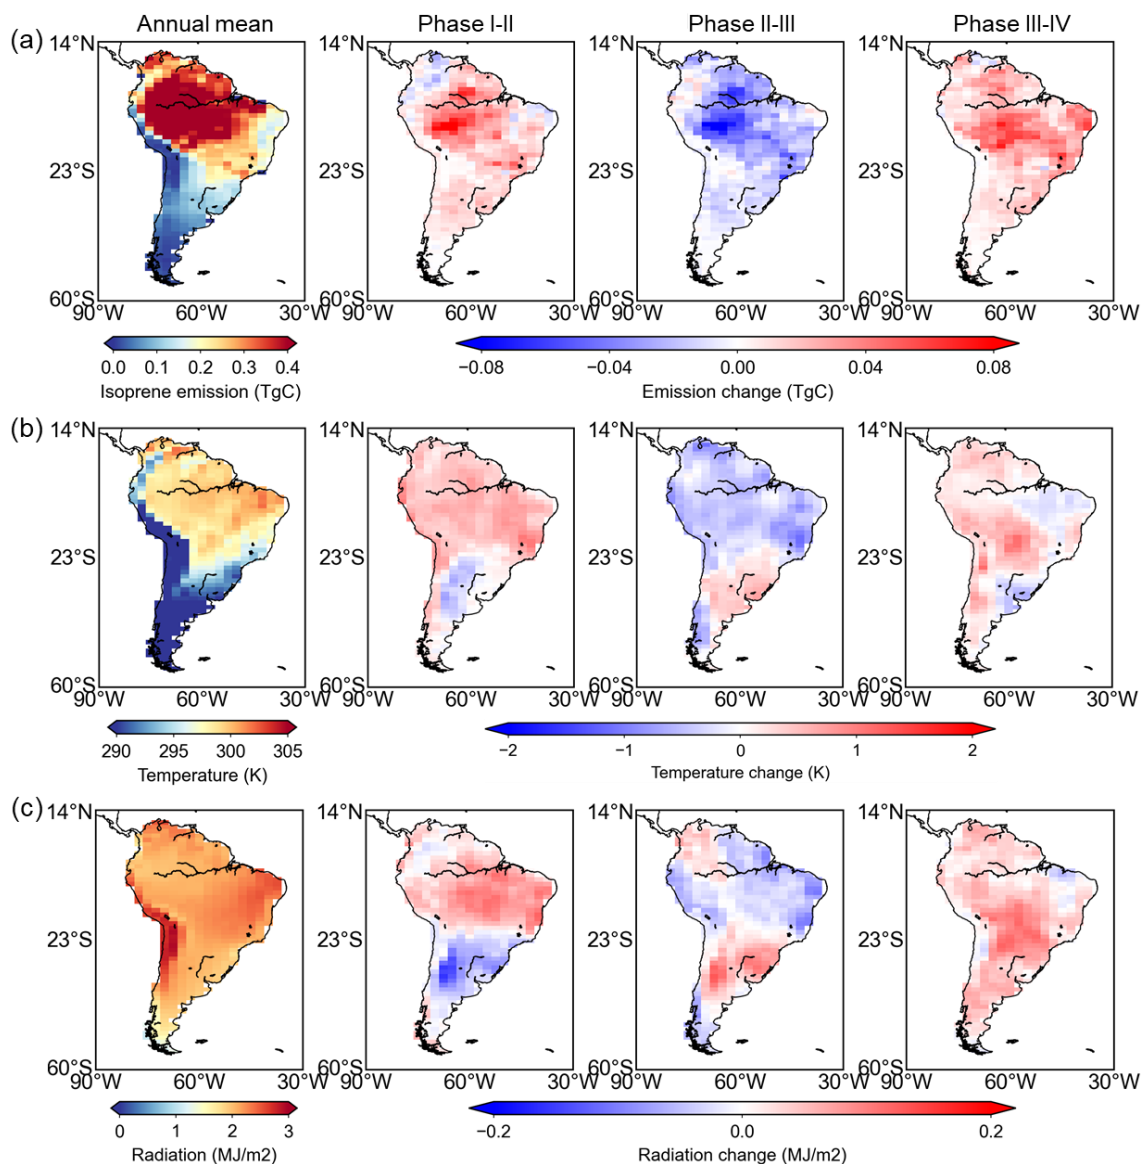

**Figure S21.** Regional annual mean and their changes across phases in Southern America (AMZ and RSAM) for (a) isoprene emissions, (b) temperature, and (c) radiation. The first column shows the annual mean, and the second to fourth columns correspond to the changes in regional values across phases.

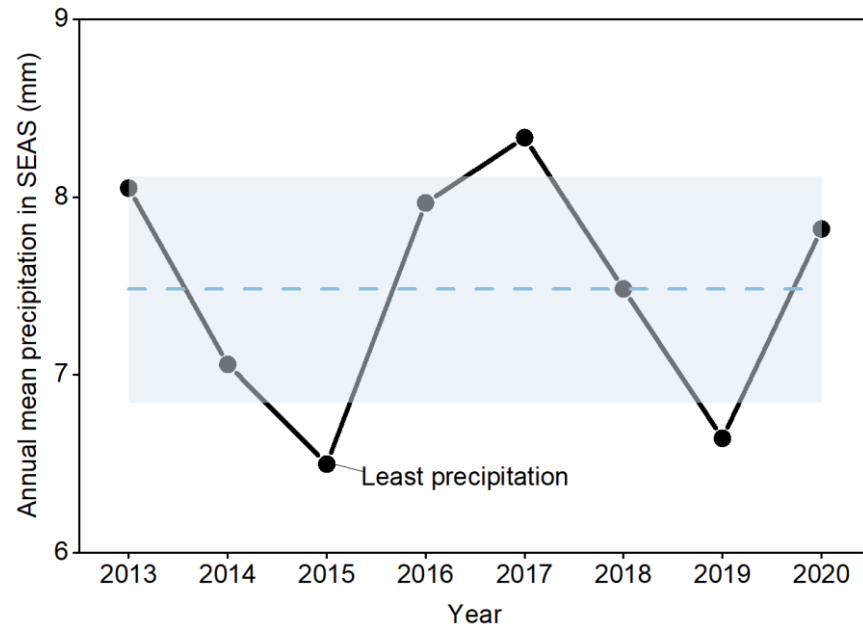

**Figure S22.** Annual average precipitation in SEAS from 2013 to 2020.

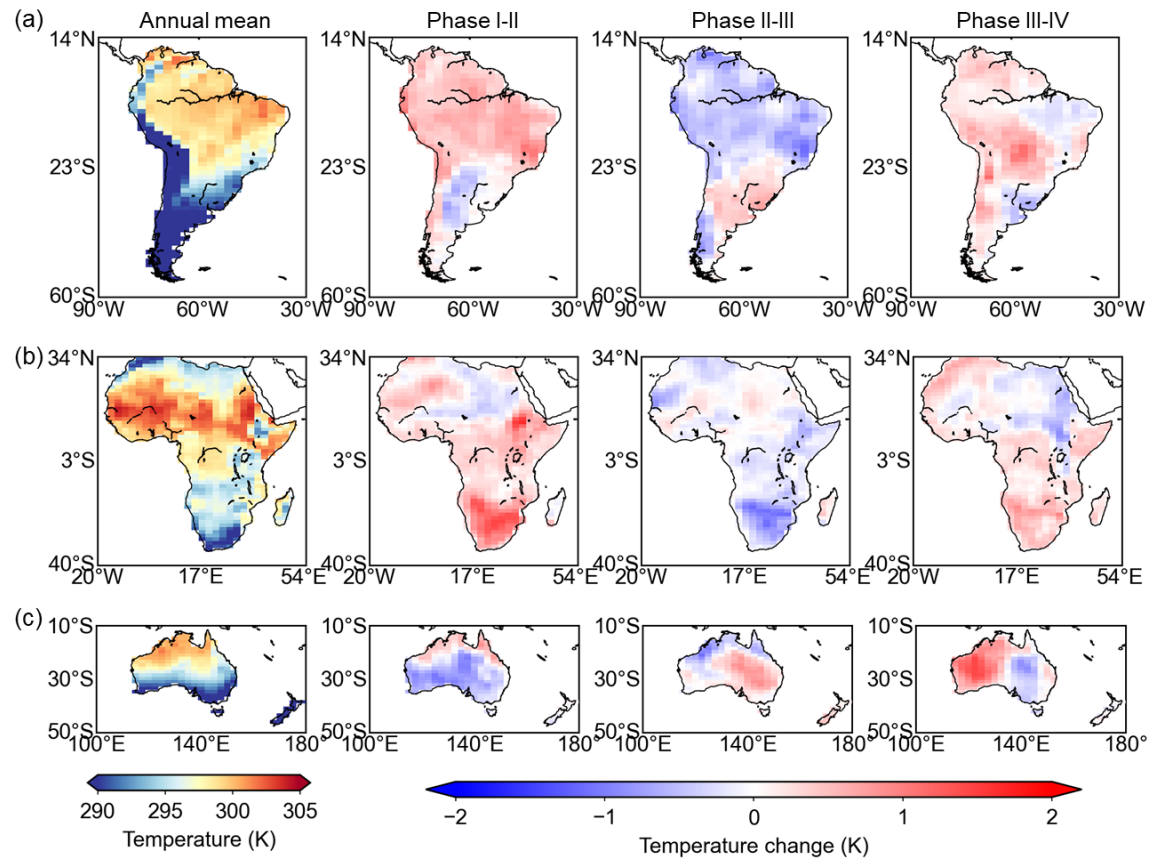

**Figure S23.** Regional annual average temperature and their changes across phases for (a) Southern America including AMZ and RSAM, (b) Africa including NAF, EQAF, and SAF, and (c) OCE. The first column shows the annual mean temperature for each region, and the second to fourth columns correspond to the changes in regional temperature across phases.

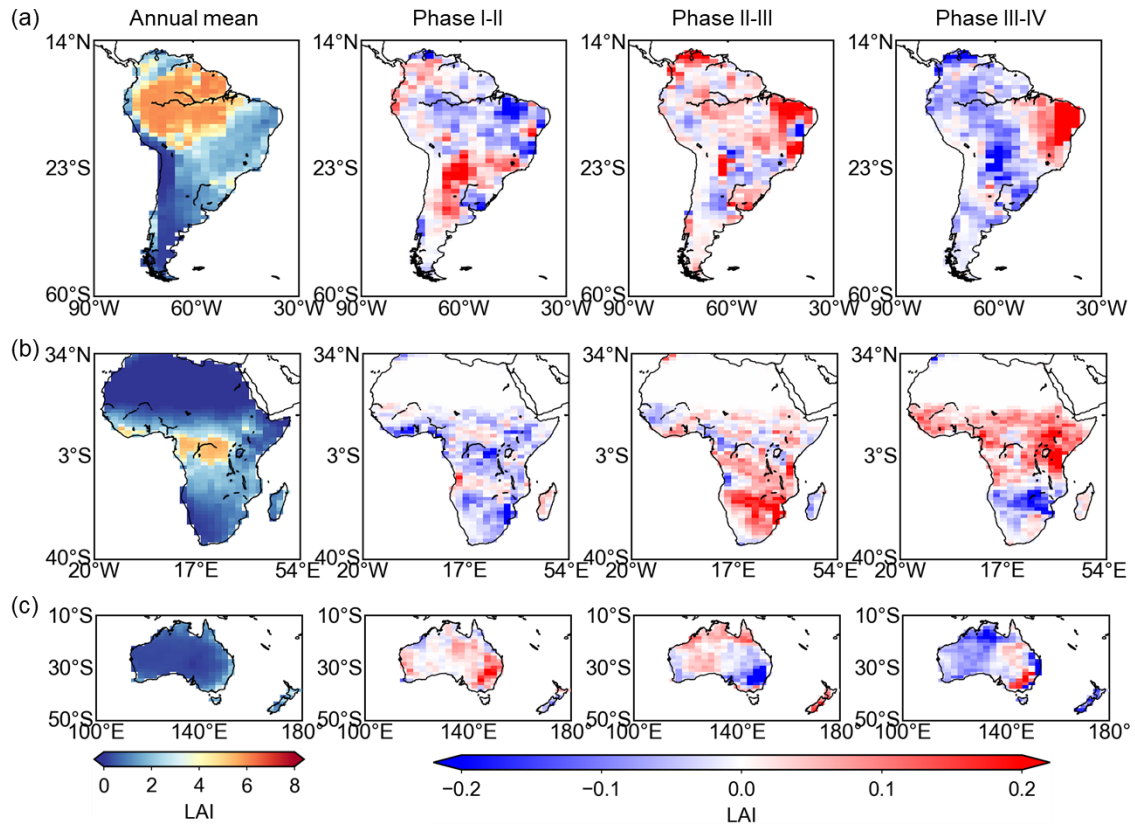

**Figure S24.** Regional annual average LAI and their changes across phases for (a) Southern America including AMZ and RSAM, (b) Africa including NAF, EQAF, and SAF, and (c) OCE. The first column shows the annual mean LAI for each region, and the second to fourth columns correspond to the changes in regional LAI across phases. LAI is from Pu et al. (2024).

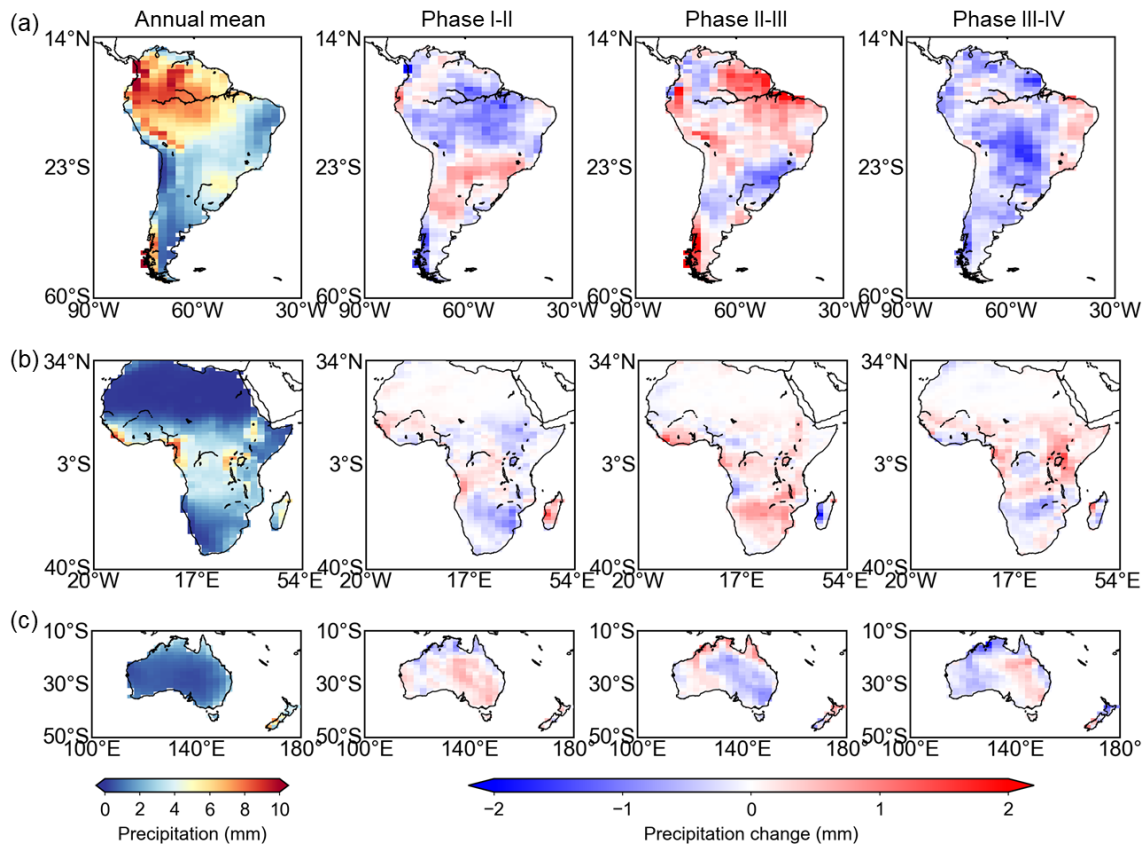

**Figure S25.** Regional annual average precipitation and their changes across phases for (a) Southern America including AMZ and RSAM, (b) Africa including NAF, EQAF, and SAF, and (c) OCE. The first column shows the annual mean precipitation for each region, and the second to fourth columns correspond to the changes in regional precipitation across phases.

146 **Table S1.** Correlation coefficient of monthly isoprene emissions and meteorological factors and LAI.  
 147 Regional classification is seen in Fig. S5.

| Correlation coefficient (R)     | Temperature | LAI  | Precipitation | Radiation | SPEI  |
|---------------------------------|-------------|------|---------------|-----------|-------|
| AMZ (Amazon)                    | 0.76        | -    | -0.69         | 0.82      | -0.48 |
| EQAF (Equatorial Africa)        | -           | 0.72 | 0.65          | -         | -     |
| RSAM (Rest of Southern America) | 0.75        | 0.41 | 0.42          | 0.82      | -0.25 |
| NAF (Northern Africa)           | 0.92        | 0.88 | 0.90          | 0.69      | 0.26  |
| SEAS (Southeast Asia)           | 0.79        | 0.73 | 0.57          | -         | -0.23 |
| CHN+KAJ (China+Korea+Japan)     | 0.91        | 0.98 | 0.96          | 0.71      | 0.24  |
| SAS (South Asia)                | 0.79        | 0.72 | 0.96          | -         | -     |
| SAF (Southern Africa)           | 0.92        | 0.52 | 0.61          | 0.87      | -     |
| MIDE (Mideast)                  | 0.95        | 0.74 | -0.74         | 0.80      | -     |
| USA (the United States)         | 0.96        | 0.98 | -             | 0.85      | -     |
| RUS+CAS (Russia+Central Asia)   | 0.93        | 0.98 | 0.92          | 0.82      | -0.56 |
| OCE (Oceania)                   | 0.91        | 0.40 | 0.40          | 0.94      | -     |
| CAM (Central America)           | 0.93        | 0.84 | 0.80          | 0.65      | -     |
| EU (Europe)                     | 0.96        | 0.97 | -             | 0.90      | -0.31 |
| CAN (Canada)                    | 0.90        | 0.98 | 0.81          | 0.70      |       |
| Global total                    | 0.92        | 0.89 | 0.87          | 0.62      | -0.43 |

148 \*Insignificant correlations ( $p > 0.05$ ) are labeled with “-” in the table.

149 **Table S2.** Regional and global annual isoprene emissions from 2013 to 2020 (TgC yr<sup>-1</sup>). Regional  
150 classification is seen in Fig. S5.

| Isoprene (TgC yr <sup>-1</sup> ) | 2013 | 2014 | 2015 | 2016 | 2017 | 2018 | 2019 | 2020 |
|----------------------------------|------|------|------|------|------|------|------|------|
| AMZ                              | 67   | 71   | 75   | 72   | 69   | 67   | 72   | 74   |
| EQAF                             | 52   | 51   | 51   | 53   | 50   | 53   | 55   | 55   |
| RSAM                             | 43   | 45   | 47   | 46   | 41   | 44   | 48   | 45   |
| NAF                              | 39   | 39   | 39   | 39   | 37   | 40   | 43   | 42   |
| SEAS                             | 34   | 36   | 34   | 36   | 35   | 36   | 38   | 37   |
| CHN+KAJ                          | 35   | 32   | 32   | 35   | 33   | 35   | 35   | 35   |
| SAS                              | 32   | 28   | 28   | 30   | 31   | 28   | 34   | 35   |
| SAF                              | 25   | 26   | 25   | 26   | 23   | 28   | 28   | 27   |
| MIDE                             | 22   | 23   | 23   | 23   | 21   | 23   | 25   | 24   |
| USA                              | 25   | 24   | 26   | 26   | 23   | 26   | 27   | 24   |
| RUS+CAS                          | 19   | 18   | 19   | 20   | 19   | 19   | 21   | 21   |
| OCE                              | 22   | 21   | 21   | 20   | 21   | 22   | 22   | 19   |
| CAM                              | 14   | 13   | 15   | 14   | 13   | 14   | 16   | 14   |
| EU                               | 11   | 11   | 11   | 11   | 11   | 12   | 12   | 11   |
| CAN                              | 8    | 9    | 8    | 8    | 7    | 9    | 8    | 8    |
| Global                           | 447  | 447  | 453  | 459  | 435  | 456  | 485  | 471  |

152 **Table S3.** Regional and global annual mean isoprene emission rates from 2013 to 2020 (unit:  $10^{-10}$  kgC  
153  $\text{m}^{-2} \text{s}^{-1}$ ). Regional classification is seen in Fig. S5.

| <b>Isoprene<br/>10<sup>-10</sup> kgC m<sup>-2</sup> s<sup>-1</sup>)</b> | <b>2013</b> | <b>2014</b> | <b>2015</b> | <b>2016</b> | <b>2017</b> | <b>2018</b> | <b>2019</b> | <b>2020</b> |
|-------------------------------------------------------------------------|-------------|-------------|-------------|-------------|-------------|-------------|-------------|-------------|
| AMZ                                                                     | 2.9         | 3.1         | 3.3         | 3.1         | 3.0         | 2.9         | 3.1         | 3.2         |
| SEAS                                                                    | 2.2         | 2.3         | 2.2         | 2.3         | 2.3         | 2.3         | 2.5         | 2.4         |
| SAS                                                                     | 2.0         | 1.7         | 1.8         | 1.8         | 1.9         | 1.8         | 2.1         | 2.1         |
| EQAF                                                                    | 2.0         | 1.9         | 1.9         | 2.0         | 1.9         | 2.0         | 2.1         | 2.1         |
| CAM                                                                     | 1.6         | 1.6         | 1.8         | 1.7         | 1.6         | 1.7         | 1.9         | 1.7         |
| RSAM                                                                    | 1.3         | 1.4         | 1.4         | 1.4         | 1.2         | 1.3         | 1.5         | 1.4         |
| SAF                                                                     | 1.2         | 1.3         | 1.2         | 1.2         | 1.1         | 1.3         | 1.4         | 1.3         |
| MIDE                                                                    | 1.1         | 1.2         | 1.2         | 1.2         | 1.1         | 1.2         | 1.3         | 1.2         |
| CHN+KAJ                                                                 | 1.1         | 1.0         | 1.0         | 1.1         | 1.0         | 1.1         | 1.1         | 1.1         |
| USA                                                                     | 1.0         | 1.0         | 1.1         | 1.1         | 0.9         | 1.1         | 1.1         | 1.0         |
| NAF                                                                     | 0.8         | 0.8         | 0.8         | 0.8         | 0.8         | 0.8         | 0.9         | 0.9         |
| OCE                                                                     | 0.9         | 0.8         | 0.8         | 0.8         | 0.8         | 0.9         | 0.9         | 0.8         |
| EU                                                                      | 0.6         | 0.6         | 0.6         | 0.6         | 0.6         | 0.7         | 0.7         | 0.6         |
| RUS+CAS                                                                 | 0.3         | 0.3         | 0.3         | 0.3         | 0.3         | 0.3         | 0.3         | 0.3         |
| CAN                                                                     | 0.2         | 0.2         | 0.2         | 0.2         | 0.2         | 0.2         | 0.2         | 0.2         |
| Global                                                                  | 1.1         | 1.1         | 1.1         | 1.1         | 1.0         | 1.1         | 1.2         | 1.1         |

155     **References**

- 156     Li, W., MacBean, N., Ciais, P., Defourny, P., Lamarche, C., Bontemps, S., Houghton, R. A., and Peng, S.:  
157     Gross and net land cover changes in the main plant functional types derived from the annual ESA CCI land  
158     cover maps (1992–2015), *Earth Syst. Sci. Data*, 10, 219–234, 10.5194/essd-10-219-2018, 2018.  
159     Pu, J., Yan, K., Roy, S., Zhu, Z., Rautiainen, M., Knyazikhin, Y., and Myneni, R. B.: Sensor-independent  
160     LAI/FPAR CDR: reconstructing a global sensor-independent climate data record of MODIS and VIIRS  
161     LAI/FPAR from 2000 to 2022, *Earth Syst. Sci. Data*, 16, 15–34, 10.5194/essd-16-15-2024, 2024.

162
